# Supplementary material
Source: PubMed Central journal article supplement (PMC2563107)
Supplement: 0803833105_0803833105SI.pdf [file 0803833105_0803833105SI.pdf]

# Supporting Information

## Vaquer-Sunyer and Duarte 10.1073/pnas.0803833105

### SI References: Experiments

1. Agnew DJ, Jones MB (1986) Metabolic adaptations of *Gammarus duebeni* Liljeborg (Crustacea, Amphipoda) to hypoxia in a sewage treatment plant *Comp Biochem Phys A* 84:475–478.
2. Alderdice D, Forrester CR (1971) Effects of salinity, temperature, and dissolved oxygen on early development of Pacific cod (*Gadus macrocephalus*) *J Fish Res Board Can* 28:883–902.
3. Allan GL, Maguire GB (1991) Lethal levels of low dissolved oxygen and effects of short-term oxygen stress on subsequent growth of juvenile *Penaeus monodon*. *Aquaculture* 94:27–37.
4. Anderson SJ, Taylor AC, Atkinson RJA (1994) Anaerobic metabolism during anoxia in the burrowing shrimp *Calocaris macandreae* Bell (Crustacea, Thalassinidea). *Comp Biochem Phys A* 108:515–522.
5. Astall CM, Jones MB (1991) Respiration and biometry in the sea cucumber *Holothuria forskali*. *J Mar Biol Assoc UK* 71:73–81.
6. Baden SP, Pihl L, Rosenberg R (1990) Effects of oxygen depletion on the ecology, blood physiology and fishery of the Norway lobster *Nephrops norvegicus*. *Mar Ecol Prog Ser* 67:141–155.
7. Baker SM, Mann R (1994) Description of metamorphic phases in the oyster *Crassostrea virginica* and effects of hypoxia on metamorphosis. *Mar Ecol Prog Ser* 104:91–99.
8. Bestwick BW, Robbins IJ, Warren LM (1989) Metabolic adaptations of the intertidal polychaete *Cirriformia tentaculata* to life in an oxygen-sink environment. *J Exp Mar Biol Ecol* 125:193–202.
9. Borum J, et al. (2005) The potential role of plant oxygen and sulphide dynamics in die-off events of the tropical seagrass, *Thalassia testudinum*. *J Ecol* 93:148–158.
10. Breitburg DL (1994) Behavioral response of fish larvae to low dissolved-oxygen concentrations in a stratified water column. *Mar Biol* 120:615–625.
11. Breitburg DL, et al. (2003) The pattern and influence of low dissolved oxygen in the Patuxent River, a seasonally hypoxic estuary. *Estuaries* 26:280–297.
12. Brett JR (1964) The respiratory metabolism and swimming performance of young sockeye salmon. *J Fish Res Board Can* 21:1183–1226.
13. Brooks SPJ, et al. (1991) Differential survival of *Venus gallina* and *Scapharca inaequivalvis* during anoxic stress: Covalent modification of phosphofructokinase and glycogen-phosphorylase during anoxia. *J Comp Physiol B* 161:207–212.
14. Burd BJ, Brinkhurst RO (1984) The distribution of the galatheid crab *Munida quadrispina* (Benedict 1902) in relation to oxygen concentrations in British Columbia fjords. *J Exp Mar Biol Ecol* 81:1–20.
15. Campbell JG, Goodman LR (2004) Acute sensitivity of juvenile shortnose sturgeon to low dissolved oxygen concentrations. *Trans Am Fish Soc* 133:772–776.
16. Cerezo J, Garcia BG (2004) The effects of oxygen levels on oxygen consumption, survival and ventilatory frequency of sharpnose sea bream (*Diplodus puntazzo* Gmelin, 1789) at different conditions of temperature and fish weight. *J Appl Ichthyol* 20:488–492.
17. Cerezo Valverde J, Garcia BG (2005) Suitable dissolved oxygen levels for common octopus (*Octopus vulgaris* Cuvier, 1797) at different weights and temperatures: Analysis of respiratory behaviour. *Aquaculture* 244:303–314.
18. Cheng SY, Chang YH, Chen JC (2004) Lethal levels of dissolved oxygen for *Haliotis diversicolor supertexta* at different salinity levels. *J Shellfish Res* 23:569–573.
19. Chittenden ME (1973) Effects of handling on oxygen requirements of American shad (*Alosa sapidissima*). *J Fish Res Board Can* 30:105–110.
20. Condon RH, Decker MB, Purcell JE (2001) Effects of low dissolved oxygen on survival and asexual reproduction of scyphozoan polyps (*Chrysaora quinquecirrha*). *Hydrobiologia* 451:89–95.
21. Das T, Stickle WB (1991) Sensitivity of the southern oyster drill, *Stramonita haemastoma*, and the blue crab, *Callinectes sapidus*, to hypoxia and anoxia. *Am Zool* 31:A126–A126.
22. Das T, Stickle WB (1993) Sensitivity of crabs *Callinectes sapidus* and *C. similis* and the gastropod *Stramonita haemastoma* to hypoxia and anoxia. *Mar Ecol Prog Ser* 98:263–274.
23. Davis J (1975) Minimal dissolved oxygen requirements of aquatic life with emphasis on Canadian species: A review. *J Fish Res Board Can* 32:2295–2331.
24. De Robertis A, Eiane K, Rau GH (2001) Eat and run: Anoxic feeding and subsequent aerobic recovery by *Orchomene obtusus* in Saanich Inlet, British Columbia, Canada. *Mar Ecol Prog Ser* 219:221–227.
25. de Zwaan A, Cattani O, Puzer VM (1993) Sulfide and cyanide-induced mortality and anaerobic metabolism in the arcid blood clam *Scapharca inaequivalvis*. *Comp Biochem Phys C* 105:49–54.
26. de Zwaan A, Cattani O, Vitali G, Cortesi P (2001) Influence of incubation conditions on the anoxic survival of marine bivalves. Static and semi-static incubations. *Mar Ecol Prog Ser* 211:169–179.
27. de Zwaan A, Cortesi P, Vandenthillart G, Roos J, Storey KB (1991) Differential sensitivities to hypoxia by 2 anoxia-tolerant marine mollusks: A biochemical analysis. *Mar Biol* 111:343–351.
28. de Zwaan A, Eertman RHM (1996) Anoxic or aerial survival of bivalves and other euryoxic invertebrates as a useful response to environmental stress: A comprehensive review. *Comp Biochem Phys C* 113:299–312.
29. Dean TL, Richardson J (1998) Responses of seven species of native freshwater fish and a shrimp to low levels of dissolved oxygen. *New Zeal J Mar Freshw* 33:99–106.
30. Dethlefsen V, Westernhagen HV (1983) Oxygen deficiency and effects on bottom fauna in the eastern German Bight 1982. *Meeresforschung* 60:42–53.
31. Diaz RJ, Neubauer RJ, Schaffner LC, Pihl L, Baden SP (1992) Continuous monitoring of dissolved oxygen in an estuary experiencing periodic hypoxia and the effect of hypoxia on macrobenthos and fish. *Sci Total Environ Suppl* 1992:1055–1068.
32. Diaz RJ, Rosenberg R (1995) Marine benthic hypoxia: A review of its ecological effects and the behavioural responses of benthic macrofauna. *Oceanogr Mar Biol* 33:245–303.
33. Diehl WJ, Mcedward L, Proffitt E, Rosenberg V, Lawrence JM (1979) Response of *Luidia clathrata* (Echinodermata, Asteroidea) to hypoxia. *Comp Biochem Phys A* 62:669–671.
34. Dries RR, Theede H (1974) Resistance to oxygen deficiency in marine bottom invertebrates of western Baltic Sea. *Mar Biol* 25:327–333.
35. Ellington WR (1982) Metabolic responses of the sea anemone *Bunodosia cavernata* (Bosc) to declining oxygen tension and anoxia. *Physiol Zool* 55:240–249.
36. Eriksson SP, Baden SP (1997) Behaviour and tolerance to hypoxia in juvenile Norway lobster (*Nephrops norvegicus*) of different ages. *Mar Biol* 128:49–54.
37. Felder DL (1979) Respiratory adaptations of the estuarine mud shrimp, *Callinassa jamaicensis* (Schmitt, 1935) (Crustacea, Decapoda, Thalassinidea). *Biol Bull* 157:125–137.
38. Fischer P, Rademacher K, Kils U (1992) *In situ* investigations on the respiration and behavior of the eelpout *Zoarces viviparus* under short-term hypoxia. *Mar Ecol Prog Ser* 88:181–184.
39. Forbes TL, Lopez GR (1990) The effect of food concentration, body size, and environmental oxygen tension on the growth of the deposit-feeding polychaete, *Capitella* species 1. *Limnol Oceanogr* 35:1535–1544.
40. Fritzsche D (1997) *Marenzelleria viridis* response to salinity changes and low oxygen partial pressure: A summary of information from resistance experiments and calorimetry. *Rostock Meeresbiol Beitr* 5:103–117.
41. Gamble JC (1970) Anaerobic survival of crustaceans *Corophium volutator*, *C. Arenarium* and *Tanais chevreuxi*. *J Mar Biol Assoc UK* 50:657–671.
42. Gamenick I, Jahn A, Vopel K, Giere O (1996) Hypoxia and sulphide as structuring factors in a macrozoobenthic community on the Baltic Sea shore: Colonisation studies and tolerance experiments. *Mar Ecol Prog Ser* 144:73–85.
43. Giere O, Preusse JH, Dubilier N (1999) *Tubificoides benedii* (Tubificidae, Oligochaeta): A pioneer in hypoxic and sulfidic environments. An overview of adaptive pathways *Hydrobiologia* 406:235–241.
44. Gray JS, Wu RSS, Or YY (2002) Effects of hypoxia and organic enrichment on the coastal marine environment. *Mar Ecol Prog Ser* 238:249–279.
45. Greve, TM, Borum J, Pedersen O (2003) Meristematic oxygen variability in eelgrass (*Zostera marina*). *Limnol Oceanogr* 48:210–216.
46. Groenendaal M (1980) Tolerance of the lugworm (*Arenicola marina*) to sulfide. *Neth J Sea Res* 14:200–207.
47. Hagerman L, Vismann B (1995) Anaerobic metabolism in the shrimp *Crangon crangon* exposed to hypoxia, anoxia and hydrogen sulfide. *Mar Biol* 123:235–240.
48. Hammen CS (1976) Respiratory adaptations: Invertebrates. *Estuarine Processes*, ed Wiley M (Academic, New York), pp 347–355.
49. Hanson D (1967) Cardiovascular dynamics and aspects of gas exchange in Chondrichthyes. PhD thesis (University of Washington).
50. Henriksson R (1969). Influence of pollution on bottom fauna of sound (Oresund). *Oikos* 20:507–523.
51. Hicks DB, Dewitt JW (1971). Effects of dissolved oxygen on Kraft pulp mill effluent toxicity. *Water Res* 5:693–701.
52. Hill AD, Taylor AC, Strang RHC (1991) Physiological and metabolic responses of the shore crab *Carcinus maenas* (L) during environmental anoxia and subsequent recovery. *J Exp Mar Biol Ecol* 150:31–50.
53. Hill B (1981) Respiratory adaptations of 3 species of *Upogebia* (Thalassinidea, Crustacea) with special reference to low tide periods. *Biol Bull* 160:272–279.
54. Hoback WW, Barnhart MC (1996) Lethal limits and sublethal effects of hypoxia on the amphipod *Gammarus pseudolimnaeus*. *J North Am Benthol Soc* 15:117–126.
55. Hughes GM, Umezawa SI (1968) On respiration in dragonet *Callionymus lyra* L. *J Exp Biol* 49:565–582.
56. Ishibashi Y, et al. (2005) Ontogeny of tolerance to hypoxia and oxygen consumption of larval and juvenile red sea bream, *Pagrus major*. *Aquaculture* 244:331–340.
57. Jahn A, Theede H (1997) Different degrees of tolerance to hydrogen sulphide in populations of *Macoma balthica* (Bivalvia, Tellinidae). *Mar Ecol Prog Ser* 154:185–196.
58. Johansson B (1997) Tolerance of the deposit-feeding Baltic amphipods *Monoporeia affinis* and *Pontoporeia femorata* to oxygen deficiency. *Mar Ecol Prog Ser* 151:135–141.
59. Johansson B (1999) Influence of oxygen levels on the predatory behaviour of the isopod *Saduria entomon*. *Mar Freshw Behav Physiol* 32:223–238.

60. Johnson PD, McMahon RF (1998) Effects of temperature and chronic hypoxia on survivorship of the zebra mussel (*Dreissena polymorpha*) and Asian clam (*Corbicula fluminea*). *Can J Fish Aquat Sci* 55:1564–1572.
61. Jorgensen BB (1980) Seasonal oxygen depletion in the bottom waters of a Danish fjord and its effect on the benthic community. *Oikos* 34:68–76.
62. Kang JC, Matsuda O (1993) Tolerance of anoxia and hydrogen sulfide by benthic crustaceans *Portunus trituberculatus*, *Metapenaeus monoceros* and *Macrobrachium nipponense*. *J Facul Appl Biol Sci Hiroshima Univ* 32:71–78.
63. Kang JC, Matsuda O (1994) Combined effects of hypoxia and hydrogen sulfide on early developmental stages of white shrimp *Metapenaeus monoceros*. *Appl Biol Sci/Seibutsu Seisangaku Kenkyu* 33:21–27.
64. Kang JC, Matsuda O, Yamamoto T (1993) Effects of low dissolved oxygen and hydrogen sulfide on early developmental stages of blue crab, *Portunus trituberculatus* in Hiroshima Bay, Japan. *J Facul Appl Biol Sci Hiroshima Univ* 32:61–70.
65. Karim MR, Sekine M, Higuchi T, Imai T, Ukita M (2003) Simulation of fish behavior and mortality in hypoxic water in an enclosed bay. *Ecol Model* 159:27–42.
66. Keckeis H, Bauer Nemeschkal E, Kamler E (1996) Effects of reduced oxygen level on the mortality and hatching rate of *Chondrostoma nasus* embryos. *J Fish Biol* 49:430–440.
67. Kruse I, Strasser M, Thiermann F (2004) The role of ecological divergence in speciation between intertidal and subtidal *Scoloplos armiger* (Polychaeta, Orbiniidae). *J Sea Res* 51:53–62.
68. Kushins LJ, Mangum CP (1971) Responses to low oxygen conditions in 2 species of mud snail *Nassarius*. *Comp Biochem Physiol* 39:421–435.
69. Kutty MN, Saunders RL (1973) Swimming performance of young Atlantic salmon (*Salmo salar*) as affected by reduced ambient oxygen concentration. *J Fish Res Board Can* 30:223–227.
70. Laudien J, Schiedek D, Brey T, Portner HO, Arntz WE (2002) Survivorship of juvenile surf clams *Donax serra* (Bivalvia, Donacidae) exposed to severe hypoxia and hydrogen sulphide. *J Exp Mar Biol Ecol* 271:9–23.
71. Lenfant C, Johansen K (1966) Respiratory function in elasmobranch *Squalus suckleyi* G. *Resp Physiol* 1:13–29.
72. Levitt JM, Arp AJ (1991) The effects of sulfide on the anaerobic metabolism of 2 congeneric species of mudflat clams. *Comp Biochem Phys B* 98:339–347.
73. Llanso RJ (1991) Tolerance of low dissolved oxygen and hydrogen sulfide by the polychaete *Streblospio benedicti* (Webster). *J Exp Mar Biol Ecol* 153:165–178.
74. Llanso RJ, Diaz RJ (1994) Tolerance to low dissolved oxygen by the tubicolous polychaete *Loimia medusa*. *J Mar Biol Assoc UK* 74:143–148.
75. MacKay RD (1974) A note on minimal levels of oxygen required to maintain life in *Penaeus schmitti*. *J Maricult Soc* 5:451–452.
76. Mangum CP (1998) Major events in the evolution of the oxygen carriers. *Am Zool* 38:1–13.
77. Mangum DC (1980) Sea anemone neuromuscular responses in anaerobic conditions. *Science* 208:1177–1178.
78. Marcus NH, Lutz RV (1994) Effects of anoxia on the viability of subitaneous eggs of planktonic copepods. *Mar Biol* 121:83–87.
79. Marcus NH, Richmond C, Sedlacek C, Miller GA, Oppert C (2004) Impact of hypoxia on the survival, egg production and population dynamics of *Acartia tonsa* Dana. *J Exp Mar Biol Ecol* 301:111–128.
80. Marshall DJ, Mcquaid CD (1993) Effects of hypoxia and hyposalinity on the heart beat of the intertidal limpets *Patella granularis* (Prosobranchia) and *Siphonaria capensis* (Pulmonata). *Comp Biochem Phys A* 106:65–68.
81. Martinez E, et al. (1998) Lethal low dissolved oxygen concentrations for postlarvae and early juvenile *Penaeus setiferus* at different salinities and pH. *J World Aquacult Soc* 29:221–229.
82. Miller DC, Poucher SL, Coiro L (2002) Determination of lethal dissolved oxygen levels for selected marine and estuarine fishes, crustaceans, and a bivalve. *Mar Biol* 140:287–296.
83. Morrissy NM, Caputi N, House RR (1984) Tolerance of marron (*Cherax tenuimanus*) to hypoxia in relation to aquaculture. *Aquaculture* 41:61–74.
84. Mountfort DO, Hay C, Taylor M, Buchanan S, Gibbs W (1999) Oxygen deprivation as a treatment for ships' ballast water: Laboratory studies and evaluation. *J Mar Environ Eng* 5:175–192.
85. Niermann U, Bauerfeind E, Hickel W, Westernhagen HV (1990) The recovery of benthos following the impact of low oxygen content in the German Bight. *Neth J Sea Res* 25:215–226.
86. Nilsson HC, Rosenberg R (1994) Hypoxic response of 2 marine benthic communities. *Mar Ecol Prog Ser* 115:209–217.
87. Normant M, Szaniawska A (2000) Behaviour, survival and glycogen utilisation in the Baltic isopod *Saduria entomon* exposed to long-term oxygen depletion. *Mar Freshw Behav Physiol* 33:201–211.
88. Ockelmann KW, Muus K (1978) Biology, ecology and behavior of bivalve *Mysella bidentata* (Montagu). *Ophelia* 17:1–93.
89. Oeschger R (1990) Long-term anaerobiosis in sublittoral marine invertebrates from the western Baltic Sea: *Halicyrtus spinulosus* (Priapulida), *Astarte borealis*, and *Arctica islandica* (Bivalvia). *Mar Ecol Prog Ser* 59:133–143.
90. Oeschger R, Theede H (1986) Untersuchungen zur Langzeit-Anaerobiose bei *Halicyrtus spinulosus* (Priapulida). *Verh Dtsch Zool Ges* 79:401.
91. Pedersen O, Binzer T, Borum J (2004) Sulphide intrusion in eelgrass (*Zostera marina* L.). *Plant Cell Environ* 27:595–602.
92. Petersen RC, Petersen LMB (1988) Compensatory mortality in aquatic populations: Its importance for interpretation of toxicant effects. *Ambio* 17:381–386.
93. Pihl L, Baden SP, Diaz RJ (1991) Effects of periodic hypoxia on distribution of demersal fish and crustaceans. *Mar Biol* 108:349–360.
94. Plante S, Chabot D, Dutil JD (1998) Hypoxia tolerance in Atlantic cod. *J Fish Biol* 53:1342–1356.
95. Putzer VM, Dezaan A, Wieser W (1990) Anaerobic energy metabolism in the oligochaete *Lumbriculus variegatus* Muller. *J Comp Physiol B* 159:707–715.
96. Randall DJ, Smith JC (1967) Regulation of cardiac activity in fish in a hypoxic environment. *Physiol Zool* 40:104–113.
97. Renaud ML (1986) Detecting and avoiding oxygen deficient sea water by brown shrimp, *Penaeus aztecus* (Ives), and white shrimp, *Penaeus setiferus* (Linnaeus). *J Exp Mar Biol Ecol* 98:283–292.
98. Rosas C, et al. (1997) Critical dissolved oxygen level to *Penaeus setiferus* and *Penaeus schmitti* postlarvae (PL10–18) exposed to salinity changes. *Aquaculture* 152:259–272.
99. Rosenberg R (1972) Benthic faunal recovery in a Swedish fjord following closure of a sulfite pulp mill. *Oikos* 23:92–108.
100. Rosenberg R, Hellman B, Johansson B (1991) Hypoxic tolerance of marine benthic fauna. *Mar Ecol Prog Ser* 79:127–131.
101. Rutherford LD, Thuesen EV (2005) Metabolic performance and survival of medusae in estuarine hypoxia. *Mar Ecol Prog Ser* 294:189–200.
102. Rychter A (1997) Effect of anoxia on the behaviour, hemolymph lactate and glycogen concentrations in the mud crab *Rhithropanopeus harrisi* ssp. *tridentatus* (Maitland) (Crustacea: Decapoda). *Oceanologia* 39:325–335, 1997.
103. Sagasti A, Schaffner LC, Duffy JE (2001) Effects of periodic hypoxia on mortality, feeding and predation in an estuarine epifaunal community. *J Exp Mar Biol Ecol* 258:257–283.
104. Sandberg E (1994) Does short-term oxygen depletion affect predator-prey relationships in zoobenthos: Experiments with the isopod *Saduria entomon*. *Mar Ecol Prog Ser* 103:73–80.
105. Sandberg E, Bonsdorff E (1996) Effects of predation and oxygen deficiency on different age classes of the amphipod *Monoporeia affinis*. *J Sea Res* 35:345–351.
106. Sassaman C, Mangum CP (1972) Adaptations to environmental oxygen levels in infaunal and epifaunal sea anemones. *Biol Bull* 143:657–678.
107. Sassaman C, Mangum CP (1973) Relationship between aerobic and anaerobic metabolism in estuarine anemones. *Comp Biochem Physiol* 44:1313–1319.
108. Saunders RL (1963) Respiration of the Atlantic cod. *J Fish Res Board Can* 20:373–386.
109. Schmidt H, Zerbst-Boroffka I (1993) Recovery after anaerobic metabolism in the leech (*Hirude medicinalis* L.). *J Comp Physiol B* 163:574–580.
110. Schottler U, Grieshaber M (1988) Adaptation of the polychaete worm *Scoloplos armiger* to hypoxic conditions. *Mar Biol* 99:215–222.
111. Schurmann H, Steffensen JF (1992) Lethal oxygen levels at different temperatures and the preferred temperature during hypoxia of the Atlantic cod, *Gadus morhua* L. *J Fish Biol* 41:927–934.
112. Schurmann H, Steffensen JF (1997) Effects of temperature, hypoxia and activity on the metabolism of juvenile Atlantic cod. *J Fish Biol* 50:1166–1180.
113. Seidman ER, Lawrence AL (1985) Growth, feed digestibility, and proximate body composition of juvenile *Penaeus vannamei* and *Penaeus monodon* grown at different dissolved oxygen levels. *World Maricult Soc* 16:333–346.
114. Shick JM (1976) Physiological and behavioral responses to hypoxia and hydrogen sulfide in infaunal asteroid *Ctenodiscus crispatus*. *Mar Biol* 37:279–289.
115. Shumway SE, Scott TM, Shick JM (1983) The effects of anoxia and hydrogen sulfide on survival, activity and metabolic rate in the coot clam, *Mulinia lateralis* (Say). *J Exp Mar Biol Ecol* 71:135–146.
116. Siefert RF, Spoor WA, Syrett RF (1973) Effects of reduced oxygen concentrations on northern pike (*Esox lucius*) embryos and larvae. *J Fish Res Board Can* 30:849–852.
117. Stickle WB, Kapper MA, Liu LL, Gnaiger E, Wang SY (1989) Metabolic adaptations of several species of crustaceans and mollusks to hypoxia: Tolerance and microcalorimetric studies. *Biol Bull* 177:303–312.
118. Tallqvist M, Sandberg-Kilpi E, Bonsdorff E (1999) Juvenile flounder, *Platichthys flesus* (L.), under hypoxia: Effects on tolerance, ventilation rate and predation efficiency. *J Exp Mar Biol Ecol* 242:75–93.
119. Tamai K (1996) Temporal tolerance of larval *Theora fragilis* (Bivalvia: Semelidae) to hypoxic conditions. *Fisheries Sci* 62:996–997.
120. Tamburri MN, Wasson K, Matsuda M (2002) Ballast water deoxygenation can prevent aquatic introductions while reducing ship corrosion. *Biol Conserv* 103:331–341.
121. Tankersley RA, Wieber MG (2000) Physiological responses of postlarval and juvenile blue crabs *Callinectes sapidus* to hypoxia and anoxia. *Mar Ecol Prog Ser* 194:179–191.
122. Taylor AC, Spicer JJ (1987) Metabolic responses of the prawns *Palaemon elegans* and *Palaemon serratus* (Crustacea, Decapoda) to acute hypoxia and anoxia. *Mar Biol* 95:521–530.
123. Thamdrup (2003) in U.S. Environmental Protection Agency (2003) *Ambient Water Quality Criteria for Dissolved Oxygen, Water Clarity and Chlorophyll a for the Chesapeake Bay and Its Tidal Tributaries*. (EPA, Washington, DC), EPA Publication 903-R-002.
124. Theede H, Ponat A, Hiroki K, Schlieper C (1969) Studies on resistance of marine bottom invertebrates to oxygen deficiency and hydrogen sulphide. *Mar Biol* 2:325–337.
125. Thompson RK, Pritchard AW (1969) Respiratory adaptations of two burrowing crustaceans, *Callinassa californiensis* and *Upogebia pugettensis* (Decapoda Thalassinidea). *Biol Bull* 136:274–287.
126. Thurberg EP, Goodlett RB (1976) Impact on clams and scallops. Part II. Low dissolved oxygen concentrations and surf clams, a laboratory study. *Oxygen Depletion and Associated Benthic Mortalities in New York Bight* (National Oceanography and Atmospheric Administration Professional Paper 11), eds Swanson RB, Sindermann CJ (NOAA, Washington, DC), pp 227–280.
127. Tyrson RV, Pearson TH, eds (1991) *Modern and Ancient Continental Shelf Anoxia* (Special Publication 58) (Geological Society, London), pp 1–24.
128. U.S. Environmental Protection Agency (2000) *Ambient Aquatic Life Water Quality Criteria for Dissolved Oxygen (Saltwater): Cape Cod to Cape Hatteras* (EPA, Washington, DC), EPA Publication 822-R-00–012.

129. U.S. Environmental Protection Agency (2000) *Ambient Water Quality Criteria for Dissolved Oxygen, Water Clarity and Chlorophyll for the Chesapeake Bay and Its Tidal Tributaries* (EPA, Washington, DC), EPA Publication 822-R-00-012.
130. Vargo SL, Sastry AN (1977) Acute temperature and low dissolved oxygen tolerances of brachyuran crab (*Cancer irroratus*) larvae. *Mar Biol* 40:165-171.
131. Vetter RAH, Franke HD, Buchholz F (1999) Habitat-related differences in the responses to oxygen deficiencies in *Idotea baltica* and *Idotea emarginata* (Isopoda, Crustacea). *J Exp Mar Biol Ecol* 239:259-272.
132. Vismann B (1990) Sulfide detoxification and tolerance in *Nereis (Hediste) diversicolor* and *Nereis (Neanthes) virens* (Annelida, Polychaeta). *Mar Ecol Prog Ser* 59:229-238.
133. Vismann B, Hagerman L (1996) Recovery from hypoxia with and without sulfide in *Saduria entomon*: Oxygen debt, reduced sulfur and anaerobic metabolites. *Mar Ecol Prog Ser* 143:131-139.
134. Vistisen B, Vismann B (1997) Tolerance to low oxygen and sulfide in *Amphiura filiformis* and *Ophiura albida* (Echinodermata: Ophiuroidea). *Mar Biol* 128:241-246.
135. Von Brand T (1946) Anaerobiosis in invertebrates. *Biodynamics Monographs* 4:1-238.
136. Voyer RA, Hennekey RJ (1972) Effects of dissolved oxygen on two life stages of mummichog. *Prog Fish Cult* 34:222-225.
137. Wahl M (1984) The fluffy sea anemone *Metridium senile* in periodically oxygen depleted surroundings. *Mar Biol* 81:81-86.
138. Wang CD, Zhang FS (1995) Effects of environmental oxygen deficiency on embryos and larvae of bay scallop, *Argopecten irradians irradians*. *Chin J Oceanogr Limnol* 13:362-369.
139. Wang WX, Widdows J (1991) Physiological responses of mussel larvae *Mytilus edulis* to environmental hypoxia and anoxia. *Mar Ecol Prog Ser* 70:223-236.
140. Warren LM (1977) Ecology of *Capitella capitata* in British waters. *J Mar Biol Assoc UK* 57:151-159.
141. Warren LM, Dales RP (1980) Glucose degradation in the polychaete annelid *Owenia fusiformis Delle Chiaje* under anaerobic conditions. *Comp Biochem Phys B* 65:443-445.
142. Webb PW, Brett JR (1972) Oxygen consumption of embryos and parents, and oxygen transfer characteristics within ovary of two species of viviparous seaperch, *Rhacochilus vacca* and *Embiotoca lateralis*. *J Fish Res Board Can* 29:1543-1553.
143. Whitmore CM, Warren CE, Doudoroff P (1960) Avoidance reactions of salmonid and centrarchid fishes to low oxygen concentrations. *Trans Am Fish Soc* 89:17-26.
144. Widdows J, Newell RIE, Mann R (1989) Effects of hypoxia and anoxia on survival, energy metabolism, and feeding of oyster larvae (*Crassostrea virginica*, Gmelin). *Biol Bull* 177:154-166.
145. Wu RSS, Lam PKS, Wan KL (2002) Tolerance to, and avoidance of, hypoxia by the penaeid shrimp (*Metapenaeus ensis*). *Environ Pollut* 118:351-355.
146. Wu RSS, Or YY (2005) Bioenergetics, growth and reproduction of amphipods are affected by moderately low oxygen regimes. *Mar Ecol Prog Ser* 297:215-223.
147. Zebe E (1982) Anaerobic metabolism in *Upogebia pugettensis* and *Callinassa californiensis* (Crustacea, Thalassinidea). *Comp Biochem Phys B* 72:613-617.

## References: Coastal Sites

1. Andersin AB, Lassig J, Parkkonen L, Sandler H (1978) The decline of macrofauna in the deeper parts of the Baltic Proper and the Gulf of Finland. *Kieler Meeresforsch* 4:23-52.
2. Andersin AB, Sandler H (1991) Macrobenthic fauna and oxygen deficiency in the Gulf of Finland. *Memoranda Soc Fauna Flora Fennica* 67:3-10.
3. Arntz WE (1981) Zonation and dynamics of macrobenthic biomass in an area stressed by oxygen deficiency. *Stress Effects on Natural Ecosystems*, eds Barret GW, Rosenberg R (John Wiley, Chichester), pp 215-225.
4. Arntz WE, Fahrbach E (1991) *El Niño. Klimaexperiment der Natur* (Birkhäuser, Basel).
5. Baden SP, Loo LO, Pihl L, Rosenberg R (1990) Effects of eutrophication on benthic communities including fish: Swedish west coast. *Ambio* 19:113-122.
6. Boesch DF, Rabalais NN (1991) Effects of hypoxia on continental shelf benthos: Comparisons between the New York Bight and the Northern Gulf of Mexico. *Modern and Ancient Continental Shelf Anoxia* (Special Publication 58), eds Tyrson RV, Pearson TH (Geological Society, London), pp 27-34.
7. Boesch DF, Rosenberg R (1981) Response to stress in marine benthic communities. *Stress Effect on Natural Ecosystems*, eds Barrett GW, Rosenberg R (Wiley, New York), pp 179-200.
8. Bonsdorff E, Laine AO, Hanninen JH, Vuorinen I, Norkko A (2003) Zoobenthos of the outer archipelago waters (N. Baltic Sea): The importance of local conditions for spatial distribution patterns. *Boreal Environ Res* 8:135-145.
9. Brearley A (2005) *Ernest Hodgkin's Swanland: Estuaries and Coastal Lagoons of Southwestern Australia* (University of Western Australia, Perth), p 550.
10. Desprez M, et al. (1992) Biological Impact of Eutrophication in the Bay of Somme and the Induction and Impact of Anoxia. *Neth J Sea Res* 30:149-159.
11. Dethlefsen V, Westernhagen HV (1983) Oxygen deficiency and effects on bottom fauna in the eastern German Bight 1982. *Meeresforschung* 60:42-53.
12. Diaz RJ (2001) Overview of hypoxia around the world. *J Environ Qual* 30:275-281.
13. Diaz RJ, Rosenberg R (1995) Marine benthic hypoxia: A review of its ecological effects and the behavioural responses of benthic macrofauna. *Oceanogr Mar Biol* 33:245-303.
14. Dyer MF, Pope JG, Fry PD, Law RJ, Portmann JE (1983) Changes in fish and benthos catches off the Danish coast in September 1981. *J Mar Biol Assoc UK* 63:767-775.
15. Eden N, Katz T, Angel DL (2003) Dynamic response of a mud snail *Nassarius sinuigerus* to changes in sediment biogeochemistry. *Mar Ecol Prog Ser* 263:139-147.
16. Engle VD, Summers JK, Macauley JM (1999) Dissolved oxygen conditions in northern Gulf of Mexico estuaries. *Environ Monitoring Assessment* 57:1-20.
17. Fallesen G, Jorgensen HM (1991) Distribution of *Nephtys hombergii* and *N. ciliata* (Polychaeta, Nephtyidae) in Arhus Bay, Denmark, with emphasis on the effect of severe oxygen deficiency. *Ophelia Suppl* 5:443-450.
18. Friligos N, Zenetos A (1988) Elefsis Bay anoxia: Nutrient conditions and benthic community structure. *Pszni Mar Ecol* 9:273-290.
19. Garlo EV, Milstein CB, Jahn AE (1979) Impact of hypoxic conditions in the vicinity of Little Egg Inlet, New Jersey in summer 1976. *Estuar Coast Mar Sci* 8:421-432.
20. Gonzalez-Oreja JA, Saiz-Salinas JI (1998) Exploring the relationships between abiotic variables and benthic community structure in a polluted estuarine system. *Water Res* 32:3799-3807.
21. Grantham BA, et al. (2004) Upwelling-driven nearshore hypoxia signals ecosystem and oceanographic changes in the northeast Pacific. *Nature* 429:749-754.
22. Harper DE, McKinney LD, Nance JM, Salzer RB (1991) The occurrence of hypoxic bottom water off the upper Texas coast and its effects on the benthic biota. *Modern and Ancient Continental Shelf Anoxia* (Special Publication 58), eds Tyrson RV, Pearson TH (Geological Society, London), pp 49-64.
23. Harper DE, McKinney LD, Salzer RR, Case RJ (1981) The occurrence of hypoxic bottom water off the upper Texas coast and its effects on the benthic biota. *Contrib Mar Sci* 24:53-79.
24. Hearn CJ, Robson BJ (2001) Inter-annual variability of bottom hypoxia in shallow Mediterranean estuaries. *Estuar Coast Shelf Sci* 52:643-657.
25. Helly JJ, Levin LA (2004) Global distribution of naturally occurring marine hypoxia on continental margins. *Deep Sea Res I: Oceanogr Res Papers* 51:1159-1168.
26. Holland AF, Shaughnessy AT, Hiegel MH (1987) Long-term Variation in mesohaline Chesapeake Bay macrobenthos: Spatial and temporal patterns. *Estuaries* 10:227-245.
27. Holte B, Oug E, Dahle S (2005) Soft-bottom fauna and oxygen minima in sub-arctic north Norwegian marine sill basins. *Mar Biol Res* 1:85-96.
28. Hua E, Zhang ZN, Zhang Y (2006) Meiofauna distributions at the oxygen minimum zone in Changjiang (Yangtze) River estuary waters. *Acta Oceanol Sin* 25:120-134.
29. Hyland J, et al. (1991) Macroinfaunal communities of the Santa Maria Basin on the California outer continental shelf and slope. *Mar Ecol Prog Ser* 78:147-161.
30. Imabayashi H (1986) Studies on benthic communities in eutrophicated areas of the Seto Inland Sea. 3. Effect of oxygen-deficient water on the settled abundance and size composition of the bivalve *Theora lubrica*. *Nippon Suisan Gakk* 52:391-397.
31. Jorgensen BB (1980) Seasonal oxygen depletion in the bottom waters of a Danish fjord and its effect on the benthic community. *Oikos* 34:68-76.
32. Josefson AB, Hansen JLS (2004) Species richness of benthic macrofauna in Danish estuaries and coastal areas. *Global Ecol Biogeogr* 13:273-288.
33. Josefson AB, Jensen JN (1992) Growth patterns of *Amphiura filiformis* support the hypothesis of organic enrichment in the Skagerrak Kattegat area. *Mar Biol* 112:615-624.
34. Josefson AB, Rosenberg R (1988) Long-term soft-bottom faunal changes in three shallow fjords, West Sweden. *Neth J Sea Res* 22:149-159.
35. Josefson AB, Widbom B (1988) Differential response of benthic macrofauna and meiofauna to hypoxia in the Gullmar Fjord basin. *Mar Biol* 100:31-40.
36. Karim MR, Sekine M, Ukita M (2002) Simulation of eutrophication and associated occurrence of hypoxic and anoxic condition in a coastal bay in Japan. *Mar Pollut Bull* 45:280-285.
37. Kitching JA, et al. (1976) Ecology of Lough Ine. 19. Seasonal changes in Western Trough. *J Anim Ecol* 45:731-758.
38. Laboy-Nieves EN, et al. (2001) Mass mortality of tropical marine communities in Morrocoy, Venezuela. *Bull Mar Sci* 68:163-179.
39. Lardicci C, Como S, Corti S, Rossi F (2001) Changes and recover of macrozoobenthic communities after restoration measures of the Orbetello Lagoon (Tyrrhenian coast, Italy). *Aquatic Conservation Mar Freshw Ecosystems* 11:281-287.
40. Leon-Morales R, Vargas JA (1998) Macroinfauna of a tropical fjord-like embayment: Golfo Dulce, Costa Rica. *Revista Biol Tropical* 46:81-90.
41. Leppäkoski E (1968) Some effects of pollution on the benthic environment of the Gullmarsfjord. *Helgoländer Wiss Meeresunters* 17:291-301.
42. Levin LA (2003) Oxygen minimum zone benthos: Adaptation and community response to hypoxia. *Oceanogr Mar Biol* 41:1-45.
43. Levin LA, Rathburn AE, Gutierrez D, Munoz P, Shankle A (2003) Bioturbation by symbiont-bearing annelids in near-anoxic sediments: Implications for biofacies models and paleo-oxygen assessments. *Palaeogeogr Palaeoclimatol Palaeoecol* 199:129-140.
44. Llanso RJ (1992) Effects of hypoxia on estuarine benthos: The Lower Rappahannock River (Chesapeake Bay), a case study. *Estuar Coast Shelf Sci* 35:491-515.
45. Mee LD (1992) The Black Sea in crisis: A need for concerted international action. *Ambio* 21:278-286.
46. Mirza FB, Gray JS (1981) The fauna of benthic sediments from the organically enriched Oslofjord, Norway. *J Exp Mar Biol Ecol* 54:181-207.
47. Mullins HT, Thompson JB, Mcdougall K, Vercoutere TL (1985) Oxygen-minimum zone edge effects: Evidence from the central California coastal upwelling system. *Geology* 13:491-494.
48. Niermann U, Bauerfeind E, Hickel W, Westernhagen HV (1990) The recovery of benthos following the impact of low oxygen content in the German Bight. *Neth J Sea Res* 25:215-226.
49. Nobre AM, et al. (2005) Management of coastal eutrophication: Integration of field data, ecosystem scale simulations and screening models. *J Mar Syst* 56:375-390.

50. Nodder SD, Pilditch CA, Probert PK, Hall JA (2003) Variability in benthic biomass and activity beneath the subtropical front, Chatham Rise, SW Pacific Ocean. *Deep Sea Res I: Oceanogr Res Papers* 50:959–985.
51. Pearson TH, Eleftheriou A (1981) The benthic ecology of Sullom-Voe. *Proc R Soc Edinb B* 80:241–269.
52. Petersen CGJ (1915) on the animal communities of the sea bottom in the Skagerak, the Christiania Fjord and the Danish waters. *Rep Danish Biol Station* 23:1–28.
53. Pihl L, Baden SP, Diaz RJ (1991) Effects of periodic hypoxia on distribution of demersal fish and crustaceans. *Mar Biol* 108:349–360.
54. Rabalais NN, Turner RE, Wiseman WJ, Boesch DF (1991) A brief summary of hypoxia on the northern Gulf of Mexico continental shelf: 1985–1988. *Modern and Ancient Continental Shelf Anoxia* (Special Publication 58), eds Tyrson RV, Pearson TH (Geological Society, London), pp 35–47, 1991.
55. Rainer SF, Fitzhardinge RC (1981) Benthic communities in an estuary with periodic deoxygenation. *Austral J Mar Freshw Res* 32:227–243.
56. Rosenberg R (1980) Effects of oxygen deficiency on benthic macrofauna in fjords. *Fjord Oceanography*, eds Freeland JH, Farmer DM, Levings C (Plenum, New York), pp 499–514.
57. Rosenberg R (1990) Negative oxygen trends in Swedish coastal bottom waters. *Mar Pollut Bull* 21:335–339.
58. Rosenberg R, et al. (1983) Benthos biomass and oxygen deficiency in the upwelling system off Peru. *J Mar Res* 41:263–279.
59. Rosenberg R, et al (1990) Marine eutrophication case studies in Sweden. *Ambio* 19:102–108.
60. Rosenberg R, Gray JS, Josefson AB, Pearson TH (1987) Petersen benthic stations revisited. 2. Is the Oslofjord and Eastern Skagerrak enriched. *J Exp Mar Biol Ecol* 105:219–251.
61. Rosenberg R, Loo LO (1988) Marine eutrophication induced oxygen deficiency: Effects on soft bottom fauna, western Sweden. *Ophelia* 29:213–225.
62. Rosenberg R, Loo LO, Moller P (1992) Hypoxia, salinity and temperature as structuring factors for marine benthic communities in a eutrophic area. *Neth J Sea Res* 30:121–129.
63. Rosenberg R, Nilsson HC, Diaz RJ (2001) Response of benthic fauna and changing sediment redox profiles over a hypoxic gradient. *Estuar Coast Shelf Sci* 53:343–350.
64. Santos SL, Simon JL (1980) Marine soft bottom community establishment following annual defaunation: Larval or adult recruitment. *Mar Ecol Prog Ser* 2:235–241.
65. Scavia D, et al. (2002) Climate change impacts on US coastal and marine ecosystems. *Estuaries* 25:149–164.
66. Schmaljohann R, et al. (2001) Oxygen-minimum zone sediments in the northeastern Arabian Sea off Pakistan: A habitat for the bacterium *Thioploca*. *Mar Ecol Prog Ser* 220:295–295.
67. Sindermann CJ, Swanson RL (1980) Historical and regional perspective. *Oxygen Depletion and Associated Benthic Mortalities in New York Bight* (National Oceanography and Atmospheric Administration Professional Paper 11), eds Swanson RB, Sindermann CJ (NOAA, Washington, DC), pp 1–16.
68. Somerfield PJ, Fonseca-Genevois VG, Rodrigues ACL, Castro FJV, Santos GAP (2003) Factors affecting meiofaunal community structure in the Pina Basin, an urbanized embayment on the coast of Pernambuco, Brazil. *J Mar Biol Assoc UK* 83:1209–1213.
69. Stachowitsch M (1991) Anoxia in the northern Adriatic Sea: Rapid death, slow recovery. *Modern and Ancient Continental Shelf Anoxia* (Special Publication 58), eds Tyrson RV, Pearson TH (Geological Society, London), pp 119–129.
70. Stenton-Dozey J, Probyn T, Busby A (2001) Impact of mussel (*Mytilus galloprovincialis*) raft culture on benthic macrofauna, *in situ* oxygen uptake, and nutrient fluxes in Saldanha Bay, South Africa. *Can J Fish Aquat Sci* 58:1021–1031.
71. Suzuki T (2001) Oxygen-deficient waters along the Japanese coast and their effects upon the estuarine ecosystem. *J Environ Qual* 30:291–302.
72. Tenore KR (1972) Macrobenthos of the Pamlico River estuary, North Carolina. *Ecol Monogr* 42:51–69.
73. Tolmazin D (1985) Changing coastal oceanography of the Black Sea. 1. Northwestern shelf. *Prog Oceanogr* 15:217–276.
74. Tsutsumi H (1987) Population dynamics of *Capitella capitata* (Polychaeta, Capitellidae) in an organically polluted cove. *Mar Ecol Prog Ser* 36:139–149.
75. Tulkki P (1965) Disappearance of benthic fauna from Basin of Bornholm (southern Baltic) due to oxygen deficiency. *Cah Biol Mar* 6:455–463.
76. Tunnicliffe V (1981) High species diversity and abundance of the epibenthic community in an oxygen-deficient basin. *Nature* 294:354–356.
77. Uzaki N, Kai M, Aoyama H, Suzuki T (2003) Changes in mortality rate and glycogen content of the Manila clam *Ruditapes philippinarum* during the development of oxygen-deficient waters. *Fisheries Sci* 69:936–943.
78. Weigelt M (1990) Oxygen conditions in the deep water of Kiel Bay and the impact on inflowing salt-rich water from the Kattegatt. *Meeresforschung* 31:1–22.
79. Westernhagen HV, Dethlefsen V (1983) North Sea oxygen deficiency 1982 and its effects on the bottom fauna. *Ambio* 12:264–266.
80. Witte U, Aberle N, Sand M, Wenzhofer F (2003) Rapid response of a deep-sea benthic community to POM enrichment: An *in situ* experimental study. *Mar Ecol Prog Ser* 251:27–36.
81. Wu RSS (1982) Periodic defaunation and recovery in a sub-tropical epibenthic community, in relation to organic pollution. *J Exp Mar Biol Ecol* 64:253–269.
82. Yamamuro M, Hiratsuka J, Ishitobi Y (2000) Seasonal change in a filter-feeding bivalve *Musculista senhousia* population of a eutrophic estuarine lagoon. *J Mar Syst* 26:117–126.
83. Yin KD, Lin ZF, Ke ZY (2004) Temporal and spatial distribution of dissolved oxygen in the Pearl River Estuary and adjacent coastal waters. *Continental Shelf Res* 24:1935–1948.
84. Yokoyama H (1995) Occurrence of *Paraprionospio* Sp (form a) larvae (Polychaeta, Spionidae) in hypoxic water of an enclosed bay. *Estuar Coast Shelf Sci* 40:9–19.
85. Yokoyama H (2002) Impact of fish and pearl farming on the benthic environments in Gokasho Bay: Evaluation from seasonal fluctuations of the macrobenthos. *Fisheries Sci* 68:258–268.
86. Zaitsev YP (1991) Cultural eutrophication of the Black Sea and other south European seas. *La Mer* 29:1–7.

**Table S2. Overview of the use of thresholds of hypoxia in the published literature**

| mg O <sub>2</sub> /liter | Reference                                                              |
|--------------------------|------------------------------------------------------------------------|
| 0.29                     | Fiadeiro and Strickland 1968                                           |
| 0.71                     | Weeks et al 2002                                                       |
| 1.00                     | Vismann 1990                                                           |
| 1.14                     | Normant and Szaniawska 2000                                            |
| 0.5–2                    | Gray <i>et al.</i> 2002                                                |
| 1.50                     | Baker and Mann 1994                                                    |
| 2.00                     | Grantham <i>et al.</i> 2004                                            |
| 2.00                     | Steimle and Sindermann 1978                                            |
| 2.00                     | Díaz 2001                                                              |
| 2.00                     | Eden <i>et al.</i> 2003                                                |
| 2.00                     | U.S. EPA Environmental Monitoring and Assessment Program for Estuaries |
| 2.00                     | Tyson and Pearson 1991                                                 |
| 2.00                     | Engle <i>et al.</i> 1999                                               |
| 2.00                     | Breitburg 1994                                                         |
| 2.00                     | Condon <i>et al.</i> 2001                                              |
| 2.00                     | Llanso 1992                                                            |
| 2.00                     | Llanso 1991                                                            |
| 2.00                     | Miller <i>et al.</i> 2002                                              |
| 2.00                     | Pihl <i>et al.</i> 1991                                                |
| 2.00                     | Renaud 1986                                                            |
| 2.00                     | Sagasti <i>et al.</i> 2001                                             |
| 2.00                     | Scavia <i>et al.</i> 2002                                              |
| 2.00                     | Stickle <i>et al.</i> 1989                                             |
| 2.00                     | Suzuki 2001                                                            |
| 2.00                     | Tallqvist <i>et al.</i> 1999                                           |
| 2.00                     | Uzaki <i>et al.</i> 2003                                               |
| 2.00                     | Yin <i>et al.</i> 2004                                                 |
| 2.05                     | Eriksson and Baden 1997                                                |
| 2.12                     | Tankersley <i>et al.</i> 2000                                          |
| 2.30                     | U.S. EPA                                                               |
| 2.40                     | Yokoyama 2002                                                          |
| 2.50                     | Karim <i>et al.</i> 2003                                               |
| 2.80                     | Ruthenford and Thuesen 2005                                            |
| 2.80                     | Wu and Or 2005                                                         |
| 2.86                     | Diaz and Rosenberg 1995                                                |
| 2.86                     | Karlson <i>et al.</i> 2005                                             |
| 2.86                     | Baden <i>et al.</i> 1990                                               |
| 2.86                     | Josefson and Hansen 2004                                               |
| 2.86                     | Widbom                                                                 |
| 2.86                     | Marcus <i>et al.</i> 2004                                              |
| 2.86                     | Rosenberg <i>et al.</i> 1990                                           |
| 2.86                     | Rosenberg <i>et al.</i> 1991                                           |
| 2.86                     | Rosenberg <i>et al.</i> 1992                                           |
| 2.86                     | Rosenberg <i>et al.</i> 2001                                           |
| 2.86                     | Diaz and Rosenberg 2008                                                |
| 3.40                     | Kang and Matsuda 1994                                                  |
| 3.60                     | Yanagi 1989                                                            |
| 3.60                     | Sekine <i>et al.</i> 1995                                              |
| 3.60                     | Karim <i>et al.</i> 2002                                               |
| 4.00                     | Paerl 2006                                                             |
| 2.28                     | Overall mean                                                           |

For references, refer to [SI References](#).

Table S4. Median sublethal oxygen concentrations of benthic marine organisms reported in experimental assessments.

| Taxa       | Group         | Sp.                                  | Sublethal threshold<br>O <sub>2</sub> , mg O <sub>2</sub> /liter | Ref.                                                |
|------------|---------------|--------------------------------------|------------------------------------------------------------------|-----------------------------------------------------|
| Algae      | Eelgrass      | <i>Zostera marina</i>                | 2.96                                                             | Pedersen <i>et al.</i> 2004                         |
| Hydrozoa   | Anthomedusae  | <i>Euphysa falmmea</i>               | 1.73                                                             | Rutherford and Thuesen 2005                         |
| Hydrozoa   | Anthomedusae  | <i>Halitholus sp.</i>                | 1.34                                                             | Rutherford and Thuesen 2005                         |
| Hydrozoa   | Anthomedusae  | <i>Polyorchis penicillatus</i>       | 0.43                                                             | Rutherford and Thuesen 2005                         |
| Hydrozoa   | Anthomedusae  | <i>Sarsia sp.</i>                    | 0.53                                                             | Rutherford and Thuesen 2005                         |
| Hydrozoa   | Leptomedusae  | <i>Aequorea victoria</i>             | 0.38                                                             | Rutherford and Thuesen 2005                         |
| Hydrozoa   | Leptomedusae  | <i>Clytia gregaria</i>               | 0.63                                                             | Rutherford and Thuesen 2005                         |
| Hydrozoa   | Leptomedusae  | <i>Eutonina indicans</i>             | 1.00                                                             | Rutherford and Thuesen 2005                         |
| Hydrozoa   | Limnomedusae  | <i>Proboscoidactyla flavicirrata</i> | 0.49                                                             | Rutherford and Thuesen 2005                         |
| Hydrozoa   | Calycophora   | <i>Mugiaea atlantica</i>             | 0.22                                                             | Rutherford and Thuesen 2005                         |
| Hydrozoa   | Limnomedusae  | <i>Proboscoidactyla flavicirrata</i> | 0.55                                                             | Rutherford and Thuesen 2005                         |
| Hydrozoa   | Limnomedusae  | <i>Proboscoidactyla flavicirrata</i> | 0.43                                                             | Rutherford and Thuesen 2005                         |
| Hydrozoa   | Calycophora   | <i>Muggiaea atlantica</i>            | 0.19                                                             | Rutherford and Thuesen 2005                         |
| Hydrozoa   | Calycophora   | <i>Muggiaea atlantica</i>            | 0.24                                                             | Rutherford and Thuesen 2005                         |
| Scyphozoa  | Sematostomae  | <i>Aurelia labiata</i>               | 0.41                                                             | Rutherford and Thuesen 2005                         |
| Scyphozoa  | Sematostomae  | <i>Cyanea capillata</i>              | 0.57                                                             | Rutherford and Thuesen 2005                         |
| Scyphozoa  | Sematostomae  | <i>Phacellophora camtschatica</i>    | 0.40                                                             | Rutherford and Thuesen 2005                         |
| Anemone    |               | <i>Cerianthopsis americanus</i>      | 0.71                                                             | Diaz, unpublished data                              |
| Anemone    |               | <i>Bunodosoma cavernata</i>          | 1.43                                                             | Ellington 1981                                      |
| Anemone    |               | <i>Metridium savene</i>              | 1.43                                                             | Sassaman and Mangum 1972                            |
| Polychaeta | Amphictenidae | <i>Pectinaria koreni</i>             | 1.00                                                             | Nilsson and Rosenberg 1994                          |
| Polychaeta | Spionidae     | <i>Streblospio benedicti</i>         | 0.57                                                             | Llansó 1991                                         |
| Polychaeta | Spionidae     | <i>Streblospio benedicti</i>         | 1.00                                                             | Llansó 1991                                         |
| Polychaeta | Terebellidae  | <i>Loimia medusa</i>                 | 1.00                                                             | Llansó and Díaz 1994                                |
| Polychaeta | Capitellidae  | <i>Capitella sp.</i>                 | 1.14                                                             | Warren 1977; Forbes and Lopez 1990                  |
| Polychaeta | Capitellidae  | <i>Capitella sp.</i>                 | 1.14                                                             | Warren 1977                                         |
| Polychaeta |               | <i>Paraprionospio pinnata</i>        | 1.14                                                             | Diaz <i>et al.</i> 1992                             |
| Polychaeta |               | <i>Scoloplos armiger</i>             | 0.86                                                             | Schöttler and Grieshaber 1988                       |
| Polychaeta | Spionidae     | <i>Malacoceros fuliginosus</i>       | 3.43                                                             | Tyson and Pearson 1991                              |
| Polychaeta | Spionidae     | <i>Malacoceros fuliginosus</i>       | 0.71                                                             | Tyson and Pearson 1991                              |
| Mollusca   | Bivalva       | <i>Mysella bidentata</i>             | 1.00                                                             | Ockelmann and Muus 1978, Nilsson and Rosenberg 1994 |
| Mollusca   | Bivalva       | <i>Mya arenaria</i>                  | 0.57                                                             | Jorgensen 1980                                      |
| Mollusca   | Bivalva       | <i>Abra alba</i>                     | 0.57                                                             | Jorgensen 1980                                      |
| Mollusca   | Bivalva       | <i>Cerastoderma edule</i>            | 0.57                                                             | Jorgensen 1980                                      |
| Mollusca   | Gastropoda    | <i>Hydrobia ulvae</i>                | 0.57                                                             | Jorgensen 1980                                      |
| Mollusca   | Bivalva       | <i>Theora fragilis</i>               | 1.29                                                             | Tamai 1996                                          |
| Mollusca   | Cephalopoda   | <i>Octopus vulgaris</i>              | 2.35                                                             | Cerezo and García 2005                              |
| Mollusca   | Cephalopoda   | <i>Octopus vulgaris</i>              | 1.48                                                             | Cerezo and García 2005                              |
| Mollusca   | Cephalopoda   | <i>Octopus vulgaris</i>              | 2.66                                                             | Cerezo and García 2005                              |
| Mollusca   | Cephalopoda   | <i>Octopus vulgaris</i>              | 1.84                                                             | Cerezo and García 2005                              |
| Mollusca   | Cephalopoda   | <i>Octopus vulgaris</i>              | 1.26                                                             | Cerezo and García 2005                              |
| Mollusca   | Cephalopoda   | <i>Octopus vulgaris</i>              | 2.56                                                             | Cerezo and García 2005                              |
| Mollusca   | Cephalopoda   | <i>Octopus vulgaris</i>              | 3.54                                                             | Cerezo and García 2005                              |
| Mollusca   | Cephalopoda   | <i>Octopus vulgaris</i>              | 2.22                                                             | Cerezo and García 2005                              |
| Mollusca   | Cephalopoda   | <i>Octopus vulgaris</i>              | 3.14                                                             | Cerezo and García 2005                              |
| Mollusca   | Cephalopoda   | <i>Octopus vulgaris</i>              | 1.17                                                             | Cerezo and García 2005                              |
| Mollusca   | Cephalopoda   | <i>Octopus vulgaris</i>              | 1.72                                                             | Cerezo and García 2005                              |
| Mollusca   | Cephalopoda   | <i>Octopus vulgaris</i>              | 2.51                                                             | Cerezo and García 2005                              |
| Mollusca   | Cephalopoda   | <i>Octopus vulgaris</i>              | 2.46                                                             | Cerezo and García 2005                              |
| Mollusca   | Cephalopoda   | <i>Octopus vulgaris</i>              | 2.34                                                             | Cerezo and García 2005                              |
| Mollusca   | Cephalopoda   | <i>Octopus vulgaris</i>              | 1.80                                                             | Cerezo and García 2005                              |
| Mollusca   | Cephalopoda   | <i>Octopus vulgaris</i>              | 2.82                                                             | Cerezo and García 2005                              |
| Mollusca   | Cephalopoda   | <i>Octopus vulgaris</i>              | 2.50                                                             | Cerezo and García 2005                              |
| Mollusca   | Cephalopoda   | <i>Octopus vulgaris</i>              | 2.61                                                             | Cerezo and García 2005                              |
| Mollusca   | Cephalopoda   | <i>Octopus vulgaris</i>              | 2.48                                                             | Cerezo and García 2005                              |
| Mollusca   | Cephalopoda   | <i>Octopus vulgaris</i>              | 2.19                                                             | Cerezo and García 2005                              |
| Mollusca   | Cephalopoda   | <i>Octopus vulgaris</i>              | 2.87                                                             | Cerezo and García 2005                              |
| Mollusca   | Cephalopoda   | <i>Octopus vulgaris</i>              | 2.62                                                             | Cerezo and García 2005                              |
| Crustacea  | Malacostraca  | <i>Squilla empusa</i>                | 2.14                                                             | Pihl <i>et al.</i> 1991                             |
| Crustacea  | Decapoda      | <i>Penaeus setiferus</i>             | 2.14                                                             | Renaud 1986                                         |
| Crustacea  | Decapoda      | <i>Penaeus aztecus</i>               | 2.86                                                             | Renaud 1986                                         |
| Crustacea  | Decapoda      | <i>Callinectes sapidus</i>           | 2.14                                                             | Pihl <i>et al.</i> 1991                             |

Table S4. (Continued)

| Taxa          | Group          | Sp.                             | Sublethal threshold<br>O <sub>2</sub> , mg O <sub>2</sub> /liter | Ref.                                                       |
|---------------|----------------|---------------------------------|------------------------------------------------------------------|------------------------------------------------------------|
| Crustacea     | Decapoda       | <i>Penaeus aztecus</i>          | 2.86                                                             | Renaud 1986                                                |
| Crustacea     | Decapoda       | <i>Penaeus setiferus</i>        | 2.86                                                             | Renaud 1986                                                |
| Crustacea     | Decapoda       | <i>Carcinus maenas</i>          | 1.43                                                             | Hill et al. 1991                                           |
| Crustacea     | Decapoda       | <i>Munida quadrispina</i>       | 0.29                                                             | Burd and Brinkhurst 1984                                   |
| Crustacea     | Decapoda       | <i>Penaeus schmitti</i>         | 1.29                                                             | MacKay 1974                                                |
| Crustacea     | Decapoda       | <i>Penaeus schmitti</i>         | 1.71                                                             | MacKay 1974                                                |
| Crustacea     | Amphipoda      | <i>Monoporeia affinis</i>       | 3.90                                                             | Johansson 1997                                             |
| Crustacea     | Amphipoda      | <i>Sanduria entomon</i>         | 1.25                                                             | Johansson 1997                                             |
| Crustacea     | Decapoda       | <i>Penaeus schmitti</i>         | 4.50                                                             | Rosas et al. 1997                                          |
| Crustacea     | Decapoda       | <i>Penaeus schmitti</i>         | 4.50                                                             | Rosas et al. 1997                                          |
| Crustacea     | Decapoda       | <i>Penaeus schmitti</i>         | 4.00                                                             | Rosas et al. 1997                                          |
| Crustacea     | Decapoda       | <i>Penaeus schmitti</i>         | 4.50                                                             | Rosas et al. 1997                                          |
| Crustacea     | Decapoda       | <i>Penaeus schmitti</i>         | 4.50                                                             | Rosas et al. 1997                                          |
| Crustacea     | Decapoda       | <i>Penaeus setiferus</i>        | 5.20                                                             | Rosas et al. 1997                                          |
| Crustacea     | Decapoda       | <i>Penaeus setiferus</i>        | 5.00                                                             | Rosas et al. 1997                                          |
| Crustacea     | Decapoda       | <i>Penaeus setiferus</i>        | 5.00                                                             | Rosas et al. 1997                                          |
| Crustacea     | Decapoda       | <i>Penaeus setiferus</i>        | 5.00                                                             | Rosas et al. 1997                                          |
| Crustacea     | Decapoda       | <i>Penaeus setiferus</i>        | 4.50                                                             | Rosas et al. 1997                                          |
| Crustacea     | Decapoda       | <i>Penaeus setiferus</i>        | 5.00                                                             | Rosas et al. 1997                                          |
| Crustacea     | Decapoda       | <i>Penaeus setiferus</i>        | 4.50                                                             | Rosas et al. 1997                                          |
| Crustacea     | Decapoda       | <i>Penaeus setiferus</i>        | 4.00                                                             | Rosas et al. 1997                                          |
| Crustacea     | Decapoda       | <i>Penaeus vannamei</i>         | 1.91                                                             | Seidman and Lawrence 1985                                  |
| Crustacea     | Decapoda       | <i>Penaeus monodon</i>          | 2.22                                                             | Seidman and Lawrence 1985                                  |
| Crustacea     | Thalassinidea  | <i>Calocaris macandreae</i>     | 0.09                                                             | Anderson et al. 1994                                       |
| Crustacea     | Decapoda       | <i>Crangon crangon</i>          | 2.58                                                             | Sandberg et al. 1996                                       |
| Echinodermata |                | <i>Holothuria forskali</i>      | 0.86                                                             | Astall and Jones 1991                                      |
| Echinodermata |                | <i>Ophiura albida</i>           | 0.79                                                             | Dethlefsen and von Westernhagen<br>1983, Baden et al. 1990 |
| Echinodermata |                | <i>Echinocardium cordatum</i>   | 1.00                                                             | Niermann et al. 1990, Nilsson and<br>Rosenberg 1994        |
| Echinodermata |                | <i>Amphiura filiformis</i>      | 1.21                                                             | Rosenberg et al. 1991                                      |
| Echinodermata |                | <i>Amphiura chiaje</i>          | 0.77                                                             | Rosenberg et al. 1991                                      |
| Echinodermata | Amphiuridae    | <i>Micropholis atra</i>         | 0.71                                                             | Diaz et al. 1992                                           |
| Echinodermata |                | <i>Ophiura albida</i>           | 2.00                                                             | Baden et al. 1990                                          |
| Echinodermata | Platyasteridae | <i>Luidia clathrata</i>         | 2.40                                                             | Diehl et al. 1978                                          |
| Chordata      | Osteichthyes   | <i>Fish</i>                     | 4.00                                                             | Karim et al. 2002                                          |
| Chordata      | Osteichthyes   | <i>Rhacochilus vacca</i>        | 4.56                                                             | Webb and Brett 1972                                        |
| Chordata      | Osteichthyes   | <i>Squalus suckleyi</i>         | 6.69                                                             | Lenfant and Johansen 1966                                  |
| Chordata      | Osteichthyes   | <i>Scyliorhinus canicula</i>    | 4.33                                                             | Hughes and Umezawa 1968                                    |
| Chordata      | Osteichthyes   | <i>Callionymus lyra</i>         | 7.05                                                             | Hughes and Umezawa 1968                                    |
| Chordata      | Osteichthyes   | <i>Callionymus lyra</i>         | 5.63                                                             | Hughes and Umezawa 1968                                    |
| Chordata      | Osteichthyes   | <i>Hydrolagus colliel</i>       | 8.54                                                             | Hanson 1967                                                |
| Chordata      | Osteichthyes   | <i>Gadus morhua</i>             | 10.20                                                            | Saunders 1963                                              |
| Chordata      | Osteichthyes   | <i>Oncorhynchus nerka</i>       | 8.85                                                             | Brett 1964                                                 |
| Chordata      | Osteichthyes   | <i>Oncorhynchus nerka</i>       | 6.74                                                             | Davis 1973                                                 |
| Chordata      | Osteichthyes   | <i>Oncorhynchus nerka</i>       | 5.07                                                             | Randall and Smith 1967                                     |
| Chordata      | Osteichthyes   | <i>Oncorhynchus kisutch</i>     | 4.50                                                             | Whitmore et al. 1960                                       |
| Chordata      | Osteichthyes   | <i>Oncorhynchus kisutch</i>     | 9.00                                                             | Hicks and DeWitt 1971                                      |
| Chordata      | Osteichthyes   | <i>Oncorhynchus kisutch</i>     | 6.00                                                             | Hermann 1958                                               |
| Chordata      | Osteichthyes   | <i>Oncorhynchus tshawytscha</i> | 4.50                                                             | Whitmore et al. 1960                                       |
| Chordata      | Osteichthyes   | <i>Oncorhynchus tshawytscha</i> | 4.50                                                             | Whitmore et al. 1960                                       |
| Chordata      | Osteichthyes   | <i>Salmo salar</i>              | 4.50                                                             | Kuttly and Saunders 1973                                   |
| Chordata      | Osteichthyes   | <i>Alosa sapidissima</i>        | 2.75                                                             | Chittenden 1973                                            |
| Chordata      | Osteichthyes   | <i>Alosa sapidissima</i>        | 4.00                                                             | Chittenden 1973                                            |
| Chordata      | Osteichthyes   | <i>Esox lucius</i>              | 3.22                                                             | Siefert et al. 1973                                        |
| Chordata      | Osteichthyes   | <i>Fundulus heteroclitus</i>    | 4.50                                                             | Voyer and Hennekey 1972                                    |
| Chordata      | Osteichthyes   | <i>Gadus macrocephalus</i>      | 2.50                                                             | Alderdice and Forrester 1971                               |
| Chordata      | Osteichthyes   | <i>Diplodus puntazzo</i>        | 2.14                                                             | Cerezo and García 2004                                     |
| Chordata      | Osteichthyes   | <i>Diplodus puntazzo</i>        | 2.79                                                             | Cerezo and García 2004                                     |
| Chordata      | Osteichthyes   | <i>Diplodus puntazzo</i>        | 2.80                                                             | Cerezo and García 2004                                     |
| Chordata      | Osteichthyes   | <i>Diplodus puntazzo</i>        | 2.70                                                             | Cerezo and García 2004                                     |
| Chordata      | Osteichthyes   | <i>Diplodus puntazzo</i>        | 2.41                                                             | Cerezo and García 2004                                     |
| Chordata      | Osteichthyes   | <i>Diplodus puntazzo</i>        | 2.25                                                             | Cerezo and García 2004                                     |
| Chordata      | Osteichthyes   | <i>Diplodus puntazzo</i>        | 2.91                                                             | Cerezo and García 2004                                     |

**Table S4. (Continued)**

| Taxa     | Group        | Sp.                      | Sublethal threshold<br>O <sub>2</sub> , mg O <sub>2</sub> /liter | Ref.                         |
|----------|--------------|--------------------------|------------------------------------------------------------------|------------------------------|
| Chordata | Osteichthyes | <i>Diplodus puntazzo</i> | 2.05                                                             | Cerezo and García 2004       |
| Chordata | Osteichthyes | <i>Diplodus puntazzo</i> | 1.94                                                             | Cerezo and García 2004       |
| Chordata | Osteichthyes | <i>Gadus morhua</i>      | 1.74                                                             | Schurmann and Stefenses 1997 |
| Chordata | Osteichthyes | <i>Gadus morhua</i>      | 2.17                                                             | Schurmann and Stefenses 1997 |
| Chordata | Osteichthyes | <i>Gadus morhua</i>      | 2.55                                                             | Schurmann and Stefenses 1997 |

For references, refer to [SI References](#).

## Other Supporting Information Files

[Table S1](#)

[Table S3](#)

[Table S5](#)
